# Supplementary material
Source: publisher figshare collection journal article supplement (https://springernature.figshare.com/articles/dataset/_/5016116)
Supplement: Supplementary file 1 [file 1]

## REPUBLIQUE DEMOCRATIQUE DU CONGO

## Section I: Information d'Identification

Les enquêteurs complètent cette section pour tous les points de distribution.

|                                                                                                                                                                                                                                                                                                                                                                                                                                                                                                                                                                    |                          |                                      |                                    |                                                            |                |                         |                   |                                     |                          |                            |                                    |                |            |                      |  |  |                      |                     |  |
|--------------------------------------------------------------------------------------------------------------------------------------------------------------------------------------------------------------------------------------------------------------------------------------------------------------------------------------------------------------------------------------------------------------------------------------------------------------------------------------------------------------------------------------------------------------------|--------------------------|--------------------------------------|------------------------------------|------------------------------------------------------------|----------------|-------------------------|-------------------|-------------------------------------|--------------------------|----------------------------|------------------------------------|----------------|------------|----------------------|--|--|----------------------|---------------------|--|
| <b>Identité du Point de distribution</b>                                                                                                                                                                                                                                                                                                                                                                                                                                                                                                                           |                          |                                      |                                    |                                                            |                |                         |                   |                                     |                          |                            |                                    |                |            |                      |  |  |                      |                     |  |
| C1. Date d'aujourd'hui (jj/mm/aaaa)                                                                                                                                                                                                                                                                                                                                                                                                                                                                                                                                |                          | [ ][ ]-[ ][ ]-[ 2 ][ ]_0_[ 0 ][ ]_8_ |                                    |                                                            |                |                         |                   |                                     |                          |                            |                                    |                |            |                      |  |  |                      |                     |  |
| C2. Noms des Enquêteurs                                                                                                                                                                                                                                                                                                                                                                                                                                                                                                                                            |                          |                                      |                                    |                                                            |                |                         |                   |                                     |                          |                            |                                    |                |            |                      |  |  |                      |                     |  |
| 1. [ ]                                                                                                                                                                                                                                                                                                                                                                                                                                                                                                                                                             |                          |                                      |                                    |                                                            |                |                         |                   |                                     |                          |                            |                                    |                |            |                      |  |  |                      |                     |  |
| 2. [ ]                                                                                                                                                                                                                                                                                                                                                                                                                                                                                                                                                             |                          |                                      |                                    |                                                            |                |                         |                   |                                     |                          |                            |                                    |                |            |                      |  |  |                      |                     |  |
| C3. Nom de la Strate <i>(Encerclez une des réponses ci-dessous)</i>                                                                                                                                                                                                                                                                                                                                                                                                                                                                                                |                          |                                      |                                    |                                                            |                |                         |                   |                                     |                          |                            |                                    |                |            |                      |  |  |                      |                     |  |
| 1. Nord-Est                                                                                                                                                                                                                                                                                                                                                                                                                                                                                                                                                        |                          |                                      |                                    |                                                            |                |                         |                   |                                     |                          |                            |                                    |                |            |                      |  |  |                      |                     |  |
| 2. Nord-Ouest                                                                                                                                                                                                                                                                                                                                                                                                                                                                                                                                                      |                          |                                      |                                    |                                                            |                |                         |                   |                                     |                          |                            |                                    |                |            |                      |  |  |                      |                     |  |
| 3. Centre-Sud                                                                                                                                                                                                                                                                                                                                                                                                                                                                                                                                                      |                          |                                      |                                    |                                                            |                |                         |                   |                                     |                          |                            |                                    |                |            |                      |  |  |                      |                     |  |
| 4. Kinshasa                                                                                                                                                                                                                                                                                                                                                                                                                                                                                                                                                        |                          |                                      |                                    |                                                            |                |                         |                   |                                     |                          |                            |                                    |                |            |                      |  |  |                      |                     |  |
| C4. Nom de la Province:                                                                                                                                                                                                                                                                                                                                                                                                                                                                                                                                            |                          |                                      |                                    |                                                            |                |                         |                   |                                     |                          |                            |                                    |                |            |                      |  |  |                      |                     |  |
| [ ]                                                                                                                                                                                                                                                                                                                                                                                                                                                                                                                                                                |                          |                                      |                                    |                                                            |                |                         |                   |                                     |                          |                            |                                    |                |            |                      |  |  |                      |                     |  |
| C5. Nom de la Zone de Santé:                                                                                                                                                                                                                                                                                                                                                                                                                                                                                                                                       |                          |                                      |                                    |                                                            |                |                         |                   |                                     |                          |                            |                                    |                |            |                      |  |  |                      |                     |  |
| [ ]                                                                                                                                                                                                                                                                                                                                                                                                                                                                                                                                                                |                          |                                      |                                    |                                                            |                |                         |                   |                                     |                          |                            |                                    |                |            |                      |  |  |                      |                     |  |
| C6. Nom de l'Aire de Santé:                                                                                                                                                                                                                                                                                                                                                                                                                                                                                                                                        |                          |                                      |                                    |                                                            |                |                         |                   |                                     |                          |                            |                                    |                |            |                      |  |  |                      |                     |  |
| [ ]                                                                                                                                                                                                                                                                                                                                                                                                                                                                                                                                                                |                          |                                      |                                    |                                                            |                |                         |                   |                                     |                          |                            |                                    |                |            |                      |  |  |                      |                     |  |
| C7. Nom du Point de Vente <i>(Si pas de Nom, écrivez « pas de Nom »)</i>                                                                                                                                                                                                                                                                                                                                                                                                                                                                                           |                          |                                      |                                    |                                                            |                |                         |                   |                                     |                          |                            |                                    |                |            |                      |  |  |                      |                     |  |
| [ ]                                                                                                                                                                                                                                                                                                                                                                                                                                                                                                                                                                |                          |                                      |                                    |                                                            |                |                         |                   |                                     |                          |                            |                                    |                |            |                      |  |  |                      |                     |  |
| C8. Milieu <i>(Encerclez une des réponses ci-dessous)</i>                                                                                                                                                                                                                                                                                                                                                                                                                                                                                                          |                          |                                      |                                    |                                                            |                |                         |                   |                                     |                          |                            |                                    |                |            |                      |  |  |                      |                     |  |
| 0=urbain      1=rural                                                                                                                                                                                                                                                                                                                                                                                                                                                                                                                                              |                          |                                      |                                    |                                                            |                |                         |                   |                                     |                          |                            |                                    |                |            |                      |  |  |                      |                     |  |
| C9. Type de Point de Distribution <i>(Encerclez une seule réponse)</i>                                                                                                                                                                                                                                                                                                                                                                                                                                                                                             |                          |                                      |                                    |                                                            |                |                         |                   |                                     |                          |                            |                                    |                |            |                      |  |  |                      |                     |  |
| <table border="0"> <tr> <td>1. Formation sanitaire publique <i>(précisez)</i>:<br/>[ ]</td> <td>4. Supermarché</td> <td>8. Etalage sur la route</td> <td>12. Hôpital privé</td> </tr> <tr> <td>2. Pharmacie formelle (enregistrée)</td> <td>5. Alimentation/boutique</td> <td>9. Guérisseur traditionnel</td> <td>13. Autre <i>(précisez)</i><br/>[ ]</td> </tr> <tr> <td>3. "Pharmacie"</td> <td>6. Kiosque</td> <td>10. Vendeur ambulant</td> <td></td> </tr> <tr> <td></td> <td>7. Etalage au marché</td> <td>11. Clinique privée</td> <td></td> </tr> </table> |                          |                                      |                                    | 1. Formation sanitaire publique <i>(précisez)</i> :<br>[ ] | 4. Supermarché | 8. Etalage sur la route | 12. Hôpital privé | 2. Pharmacie formelle (enregistrée) | 5. Alimentation/boutique | 9. Guérisseur traditionnel | 13. Autre <i>(précisez)</i><br>[ ] | 3. "Pharmacie" | 6. Kiosque | 10. Vendeur ambulant |  |  | 7. Etalage au marché | 11. Clinique privée |  |
| 1. Formation sanitaire publique <i>(précisez)</i> :<br>[ ]                                                                                                                                                                                                                                                                                                                                                                                                                                                                                                         | 4. Supermarché           | 8. Etalage sur la route              | 12. Hôpital privé                  |                                                            |                |                         |                   |                                     |                          |                            |                                    |                |            |                      |  |  |                      |                     |  |
| 2. Pharmacie formelle (enregistrée)                                                                                                                                                                                                                                                                                                                                                                                                                                                                                                                                | 5. Alimentation/boutique | 9. Guérisseur traditionnel           | 13. Autre <i>(précisez)</i><br>[ ] |                                                            |                |                         |                   |                                     |                          |                            |                                    |                |            |                      |  |  |                      |                     |  |
| 3. "Pharmacie"                                                                                                                                                                                                                                                                                                                                                                                                                                                                                                                                                     | 6. Kiosque               | 10. Vendeur ambulant                 |                                    |                                                            |                |                         |                   |                                     |                          |                            |                                    |                |            |                      |  |  |                      |                     |  |
|                                                                                                                                                                                                                                                                                                                                                                                                                                                                                                                                                                    | 7. Etalage au marché     | 11. Clinique privée                  |                                    |                                                            |                |                         |                   |                                     |                          |                            |                                    |                |            |                      |  |  |                      |                     |  |
| <b>GPS:</b>                                                                                                                                                                                                                                                                                                                                                                                                                                                                                                                                                        |                          |                                      |                                    |                                                            |                |                         |                   |                                     |                          |                            |                                    |                |            |                      |  |  |                      |                     |  |
| C10. Nord/Sud: lecture de la latitude [ ]                                                                                                                                                                                                                                                                                                                                                                                                                                                                                                                          |                          | <b>Encerclez « Nord » ou « Sud »</b> |                                    |                                                            |                |                         |                   |                                     |                          |                            |                                    |                |            |                      |  |  |                      |                     |  |
| C11. Est: Lecture de la Longitude [ ]                                                                                                                                                                                                                                                                                                                                                                                                                                                                                                                              |                          |                                      |                                    |                                                            |                |                         |                   |                                     |                          |                            |                                    |                |            |                      |  |  |                      |                     |  |

**C12. Nombre de visites**

|                                                                                                                                                                                                                                                                                                           | Visite 1             | Visite 2             | Visite 3             |
|-----------------------------------------------------------------------------------------------------------------------------------------------------------------------------------------------------------------------------------------------------------------------------------------------------------|----------------------|----------------------|----------------------|
| Date                                                                                                                                                                                                                                                                                                      | [ ][ ]-[ ][ ]-[0][8] | [ ][ ]-[ ][ ]-[0][8] | [ ][ ]-[ ][ ]-[0][8] |
| <b>Résultat:</b><br>1 = Interview réalisée<br>2 = Fournisseur éligible Non disponible<br>3 = Point de distribution fermé pour toujours<br>4 = Point de distribution fermé au moment de la visite<br>5 = Interview interrompue<br>6 = A refusé – Si a refusé, aller à <b>Allez à C13</b><br>7 = Autre: [ ] | [ ]                  | [ ]                  | [ ]                  |
| Heure de début                                                                                                                                                                                                                                                                                            | [ ]:[ ]              | [ ]:[ ]              | [ ]:[ ]              |
| Heure de la fin                                                                                                                                                                                                                                                                                           | [ ]:[ ]              | [ ]:[ ]              | [ ]:[ ]              |

**REFUS:**

C13. Si le fournisseur a refusé, pourquoi? (**Encerclez une réponse et terminez l'interview. Si le fournisseur est trop occupé avec beaucoup de clients, demandez-lui le moment qu'il voudrait être interviewé; indiquez-le à la question C13, et revenez au moment convenu.**)

1 = Beaucoup de travail avec les clients

2 = Pense qu'il s'agit d'une inspection/est nerveux à cause de la licence

3 = Pas intéressé

4 = Refuse de donner la raison

5 =Autre (*Précisez*) [ ]

C14. Autres commentaires:

**Section II. Screening Section & Consent*****L'enquêteur pénètre dans le point de distribution.***S1. Observez les principaux articles vendus dans le Point de Vente ***(Ne posez pas de question, observez)***

1 = Médicaments

2 = Nourriture

3 = Articles de toilette

4 = Produits ménagers

5 = Cartes de crédit pour cellulaires

6 = Cigarettes

7 = Autre ***(Précisez)***: [\_\_\_\_\_]***Screening Questions:***S2. Vendez-vous/fournissez-vous présentement des antipaludiques? ***(Encerclez une réponse).***

1 = Oui

Si oui, donnez l'information sur l'enquête et obtenez le consentement.Commencez la feuille d'audit: **Allez à Q1**

0 = Non

Si Non, allez à la **question S3**S3. Avez-vous des antipaludiques en rupture de stock aujourd'hui, mais que vous aviez habituellement au cours des 3 derniers mois? ***(Encerclez une réponse).***

1 = Oui

Si oui, donnez l'information sur l'enquête et obtenez le consentement. **Allez à A13a**

0 = Non

TERMINEZ L'ENQUETE

99 = Ne sait pas

TERMINEZ L'ENQUETE

**III. Audit Sheet**

Commencez l'audit des médicaments. Utilisez des Feuilles d'Audit des Médicaments différentes selon la présentation des médicaments. Regardez à l'en-tête de chaque feuille pour voir de quel type il s'agit.

Si l'antipaludéen est sous forme de comprimés ou de suppositoires, utilisez la ***“Feuille d'Audit des Médicaments en comprimés ou suppositoires”***Si l'antipaludéen est sous une autre forme que les comprimés ou les suppositoires, utilisez la ***“Feuille d'Audit des Médicaments Non en comprimés ni suppositoires”***

**TABLET & SUPPOSITORY DRUG AUDIT SHEET** (Pour usage pour les médicaments en comprimés ou suppositoires)

Interviewer–District–SD–Outlet: [ ][ ][ ]-[ ][ ][ ]-[ ][ ][ ]-[ ][ ][ ]

|                                                                                                                                                                                                                                                                                                                                                      |              |                                                                                                                                                                                                                                                                                                                                                                                                                                           |                                                                                                                                               |                                                                                                                                                                                                                                                                                                                                                                                                                              |                                   |                                                                                                                                                                                                                                               |
|------------------------------------------------------------------------------------------------------------------------------------------------------------------------------------------------------------------------------------------------------------------------------------------------------------------------------------------------------|--------------|-------------------------------------------------------------------------------------------------------------------------------------------------------------------------------------------------------------------------------------------------------------------------------------------------------------------------------------------------------------------------------------------------------------------------------------------|-----------------------------------------------------------------------------------------------------------------------------------------------|------------------------------------------------------------------------------------------------------------------------------------------------------------------------------------------------------------------------------------------------------------------------------------------------------------------------------------------------------------------------------------------------------------------------------|-----------------------------------|-----------------------------------------------------------------------------------------------------------------------------------------------------------------------------------------------------------------------------------------------|
| 1. Nom générique                                                                                                                                                                                                                                                                                                                                     | 2. Dosage    | 3. Présentation                                                                                                                                                                                                                                                                                                                                                                                                                           | 4. Nom commercial                                                                                                                             | 5. Fabricant                                                                                                                                                                                                                                                                                                                                                                                                                 | 6. L'antipaludique est-il expiré? | 7. Conditionnement/Emballage<br>(Complétez avec le nombre et encerclez le type)<br><br>Il y a un total de [ ][ ][ ][ ] Comprimés / suppositoires dans chaque (encerclez le type de conditionnement/ emballage):<br>1 = Boîte<br>2 = Emballage |
|                                                                                                                                                                                                                                                                                                                                                      | [ ][ ][ ] mg |                                                                                                                                                                                                                                                                                                                                                                                                                                           |                                                                                                                                               |                                                                                                                                                                                                                                                                                                                                                                                                                              |                                   |                                                                                                                                                                                                                                               |
|                                                                                                                                                                                                                                                                                                                                                      | [ ][ ][ ] mg |                                                                                                                                                                                                                                                                                                                                                                                                                                           |                                                                                                                                               |                                                                                                                                                                                                                                                                                                                                                                                                                              |                                   |                                                                                                                                                                                                                                               |
| 8. Quantité en stock<br>(Ecrivez le nombre total d'emballages/conditionnements/boîtes décrits à la question 7)<br><br>Il y a [ ][ ][ ][ ][ ] conditionnements/emballages/boîtes d'antipaludiques en stock dans ce point de distribution<br><br>OU<br><br>Il y a [ ][ ][ ][ ][ ] Comprimés de cet antipaludéen en stock dans ce point de distribution | [ ][ ][ ] mg | 9. Quantité vendue/distribuée au cours de la semaine passée<br>(Ecrivez le nombre de conditionnements/emballages/boîtes décrits à la question 7 OU écrire le nombre total de comprimés vendus)<br><br>Ce point de distribution a vendu [ ][ ][ ][ ] conditionnements/emballages/boîtes au cours de la <u>semaine passée</u><br><br>OU<br><br>Ce point de distribution a vendu [ ][ ][ ][ ] Comprimés au cours de la <u>semaine passée</u> | 10. Avez-vous connu une rupture de stock en ce médicament au cours des 3 derniers mois?<br><br>1 = Oui<br><br>0 = Non<br><br>99 = Ne sait pas | 11. Prix de vente en détail<br>(Ecrivez le nombre total de <u>Comprimés/ suppositoires</u> inclus pour un prix donné, même si vendu individuellement. Si le fournisseur donne le prix de toute la cure, déterminez le nombre de comprimé/suppositoires pour la cure complète)<br><br>Ce fournisseur vend un total de [ ][ ][ ] Comprimés / suppositoires pour: [ ][ ][ ][ ][ ][ ] FC<br>(Si gratuit écrire 00000 comme prix) | 12. Commentaires                  |                                                                                                                                                                                                                                               |
|                                                                                                                                                                                                                                                                                                                                                      | [ ][ ][ ] mg |                                                                                                                                                                                                                                                                                                                                                                                                                                           |                                                                                                                                               |                                                                                                                                                                                                                                                                                                                                                                                                                              |                                   |                                                                                                                                                                                                                                               |
|                                                                                                                                                                                                                                                                                                                                                      | [ ][ ][ ] mg |                                                                                                                                                                                                                                                                                                                                                                                                                                           |                                                                                                                                               |                                                                                                                                                                                                                                                                                                                                                                                                                              |                                   |                                                                                                                                                                                                                                               |

\* \* \*

|                                                                                                                                                                                                                                                                                                                                                      |              |                                                                                                                                                                                                                                                                                                                                                                                                                                           |                                                                                                                                               |                                                                                                                                                                                                                                                                                                                                                                                                                             |                                   |                                                                                                                                                                                                                                               |
|------------------------------------------------------------------------------------------------------------------------------------------------------------------------------------------------------------------------------------------------------------------------------------------------------------------------------------------------------|--------------|-------------------------------------------------------------------------------------------------------------------------------------------------------------------------------------------------------------------------------------------------------------------------------------------------------------------------------------------------------------------------------------------------------------------------------------------|-----------------------------------------------------------------------------------------------------------------------------------------------|-----------------------------------------------------------------------------------------------------------------------------------------------------------------------------------------------------------------------------------------------------------------------------------------------------------------------------------------------------------------------------------------------------------------------------|-----------------------------------|-----------------------------------------------------------------------------------------------------------------------------------------------------------------------------------------------------------------------------------------------|
| 1. Nom générique                                                                                                                                                                                                                                                                                                                                     | 2. Dosage    | 3. Présentation                                                                                                                                                                                                                                                                                                                                                                                                                           | 4. Nonm commercial                                                                                                                            | 5. Fabricant                                                                                                                                                                                                                                                                                                                                                                                                                | 6. L'antipaludique est-il expiré? | 7. Conditionnement/Emballage<br>(Complétez avec le nombre et encerclez le type)<br><br>Il y a un total de [ ][ ][ ][ ] Comprimés / suppositoires dans chaque (encerclez le type de conditionnement/ emballage):<br>1 = Boîte<br>2 = Emballage |
|                                                                                                                                                                                                                                                                                                                                                      | [ ][ ][ ] mg |                                                                                                                                                                                                                                                                                                                                                                                                                                           |                                                                                                                                               |                                                                                                                                                                                                                                                                                                                                                                                                                             |                                   |                                                                                                                                                                                                                                               |
|                                                                                                                                                                                                                                                                                                                                                      | [ ][ ][ ] mg |                                                                                                                                                                                                                                                                                                                                                                                                                                           |                                                                                                                                               |                                                                                                                                                                                                                                                                                                                                                                                                                             |                                   |                                                                                                                                                                                                                                               |
| 8. Quantité en stock<br>(Ecrivez le nombre total d'emballages/conditionnements/boîtes décrits à la question 7)<br><br>Il y a [ ][ ][ ][ ][ ] conditionnements/emballages/boîtes d'antipaludiques en stock dans ce point de distribution<br><br>OU<br><br>Il y a [ ][ ][ ][ ][ ] Comprimés de cet antipaludéen en stock dans ce point de distribution | [ ][ ][ ] mg | 9. Quantité vendue/distribuée au cours de la semaine passée<br>(Ecrivez le nombre de conditionnements/emballages/boîtes décrits à la question 7 OU écrire le nombre total de comprimés vendus)<br><br>Ce point de distribution a vendu [ ][ ][ ][ ] conditionnements/emballages/boîtes au cours de la <u>semaine passée</u><br><br>OU<br><br>Ce point de distribution a vendu [ ][ ][ ][ ] Comprimés au cours de la <u>semaine passée</u> | 10. Avez-vous connu une rupture de stock en ce médicament au cours des 3 derniers mois?<br><br>1 = Oui<br><br>0 = Non<br><br>99 = Ne sait pas | 11. Prix de vente en détail<br>(Ecris le nombre total de <u>Comprimés/ suppositoires</u> inclus pour un prix donné, même si vendu individuellement. Si le fournisseur donne le prix de toute la cure, déterminez le nombre de comprimé/suppositoires pour la cure complète)<br><br>Ce fournisseur vend un total de [ ][ ][ ] Comprimés / suppositoires pour: [ ][ ][ ][ ][ ][ ] FC<br>(Si gratuit, écrire 00000 comme prix) | 12. Commentaires                  |                                                                                                                                                                                                                                               |
|                                                                                                                                                                                                                                                                                                                                                      | [ ][ ][ ] mg |                                                                                                                                                                                                                                                                                                                                                                                                                                           |                                                                                                                                               |                                                                                                                                                                                                                                                                                                                                                                                                                             |                                   |                                                                                                                                                                                                                                               |
|                                                                                                                                                                                                                                                                                                                                                      | [ ][ ][ ] mg |                                                                                                                                                                                                                                                                                                                                                                                                                                           |                                                                                                                                               |                                                                                                                                                                                                                                                                                                                                                                                                                             |                                   |                                                                                                                                                                                                                                               |

\* \* \*

FEUILLE D'AUDIT DES MÉDICAMENTS NON EN COMPRIMÉS NI SUPPOSITOIRES : SIROP, SUSPENSION, LIQUIDE & POUDRE POUR INJECTION, GRANULE & AUTRES Interviewer–District–SD–Outlet: [ ]-[ ]-[ ]-[ ]

|                                                                                                                                                                                                                                                       |                                                                                                                                                                                                                                                                                      |                                                                                                                                                 |                                                                                                                                          |                                                                                                                                                                                                                                                                                           |                                                                                            |                                                                                                                                                                                                                                                                                                        |
|-------------------------------------------------------------------------------------------------------------------------------------------------------------------------------------------------------------------------------------------------------|--------------------------------------------------------------------------------------------------------------------------------------------------------------------------------------------------------------------------------------------------------------------------------------|-------------------------------------------------------------------------------------------------------------------------------------------------|------------------------------------------------------------------------------------------------------------------------------------------|-------------------------------------------------------------------------------------------------------------------------------------------------------------------------------------------------------------------------------------------------------------------------------------------|--------------------------------------------------------------------------------------------|--------------------------------------------------------------------------------------------------------------------------------------------------------------------------------------------------------------------------------------------------------------------------------------------------------|
| <b>1. Nom générique</b>                                                                                                                                                                                                                               | <b>2. Dosage</b><br>[ ] mg/ [ ] mL<br>[ ] mg/ [ ] mL<br>[ ] mg/ [ ] mL<br><i>(Note: Pas de mL enregistré pour les poudres et les granules)</i>                                                                                                                                       | <b>3. Présentation</b><br>3 = Sirop<br>4 = Suspension<br>5 = Liquide injectable<br>6 = Poudre injectable<br>7 = Granule<br>8 = Autre (précisez) | <b>4. Nnm commercial</b>                                                                                                                 | <b>5. Fabricant</b>                                                                                                                                                                                                                                                                       | <b>6. L'antipaludique est-il expiré?</b><br><br>1 = Oui<br>0 = Non<br><br>99 = Ne sait pas | <b>7. Conditionnement/Emballage</b> (Ecrire le nombre ET Encerclez le type)<br><br>Il y un total de [ ] mL (ou mg pour la poudre pour injection et les granules) dans chaque: (Encerclez le type de conditionnement/emballage):<br><br>1 = Bouteille<br>2 = Ampoule / flacon<br>3 = Sachet de Granules |
| <b>8. Quantité en stock</b><br>(Ecrivez le nombre total de bouteilles, ampoules/flacons, ou sachets précisés à la question 7)<br><br>Il y a [ ] bouteilles / ampoules / flacons / sachets de cet antipaludique en stock dans ce point de distribution | <b>9. Quantité vendue / distribuée au cours de la semaine passée</b><br>(Ecrivez le nombre de bouteilles, ampoules, flacons ou sachets précisés à la question 7)<br><br>Ce point de distribution a vendu [ ] bouteilles / ampoules / flacons / sachets au cours de la semaine passée |                                                                                                                                                 | <b>10. Avez-vous connu une rupture de stock en ce médicament au cours des 3 derniers mois?</b><br>1 = Oui<br>0 = Non<br>99 = Ne sait pas | <b>11. Prix de vente en détail</b><br>(Ecrivez le nombre total d'emballages/conditionnements qui sont inclus dans un prix donné ET écrire le prix)<br><br>Ce fournisseur vend un nombre total de [ ] bouteilles / ampoules / flacons / sachets<br>pour: [ ] FC (Si gratuit, écrire 00000) |                                                                                            | <b>12. Commentaires</b>                                                                                                                                                                                                                                                                                |

\* \* \*

|                                                                                                                                                                                                                                                       |                                                                                                                                                                                                                                                                                      |                                                                                                                                                 |                                                                                                                                          |                                                                                                                                                                                                                                                                                           |                                                                                            |                                                                                                                                                                                                                                                                                                        |
|-------------------------------------------------------------------------------------------------------------------------------------------------------------------------------------------------------------------------------------------------------|--------------------------------------------------------------------------------------------------------------------------------------------------------------------------------------------------------------------------------------------------------------------------------------|-------------------------------------------------------------------------------------------------------------------------------------------------|------------------------------------------------------------------------------------------------------------------------------------------|-------------------------------------------------------------------------------------------------------------------------------------------------------------------------------------------------------------------------------------------------------------------------------------------|--------------------------------------------------------------------------------------------|--------------------------------------------------------------------------------------------------------------------------------------------------------------------------------------------------------------------------------------------------------------------------------------------------------|
| <b>1. Nom générique</b>                                                                                                                                                                                                                               | <b>2. Dosage</b><br>[ ] mg/ [ ] mL<br>[ ] mg/ [ ] mL<br>[ ] mg/ [ ] mL<br><i>(Note: Pas de mL enregistré pour les poudres et les granules)</i>                                                                                                                                       | <b>3. Présentation</b><br>3 = Sirop<br>4 = Suspension<br>5 = Liquide injectable<br>6 = Poudre injectable<br>7 = Granule<br>8 = Autre (précisez) | <b>4. Nom commercial</b>                                                                                                                 | <b>5. Fabricant</b>                                                                                                                                                                                                                                                                       | <b>6. L'antipaludique est-il expiré?</b><br><br>1 = Oui<br>0 = Non<br><br>99 = Ne sait pas | <b>7. Conditionnement/Emballage</b> (Ecrire le nombre ET Encerclez le type)<br><br>Il y un total de [ ] mL (ou mg pour la poudre pour injection et les granules) dans chaque: (Encerclez le type de conditionnement/emballage):<br><br>1 = Bouteille<br>2 = Ampoule / flacon<br>3 = Sachet de Granules |
| <b>8. Quantité en stock</b><br>(Ecrivez le nombre total de bouteilles, ampoules/flacons, ou sachets précisés à la question 7)<br><br>Il y a [ ] bouteilles / ampoules / flacons / sachets de cet antipaludique en stock dans ce point de distribution | <b>9. Quantité vendue / distribuée au cours de la semaine passée</b><br>(Ecrivez le nombre de bouteilles, ampoules, flacons ou sachets précisés à la question 7)<br><br>Ce point de distribution a vendu [ ] bouteilles / ampoules / flacons / sachets au cours de la semaine passée |                                                                                                                                                 | <b>10. Avez-vous connu une rupture de stock en ce médicament au cours des 3 derniers mois?</b><br>1 = Oui<br>0 = Non<br>99 = Ne sait pas | <b>11. Prix de vente en détail</b><br>(Ecrivez le nombre total d'emballages/conditionnements qui sont inclus dans un prix donné ET écrire le prix)<br><br>Ce fournisseur vend un nombre total de [ ] bouteilles / ampoules / flacons / sachets<br>pour: [ ] FC (Si gratuit, écrire 00000) |                                                                                            | <b>12. Commentaires</b>                                                                                                                                                                                                                                                                                |

\* \* \*

Interviewer Code – District – Sub-District – Outlet ID: [ ][ ][ ]-[ ][ ][ ]-[ ][ ][ ]-[ ][ ][ ]

A13. Avez-vous des antipaludiques en rupture de stock aujourd'hui, mais que vous aviez habituellement au cours des 3 derniers mois? (**Encerclez une réponse**).

|                  |                         |
|------------------|-------------------------|
| 1 = Oui          | Allez à la question 13a |
| 0 = Non          | Allez à la question 14  |
| 99 = Ne sait pas | Allez à la question 14  |

A13a. Que sont les noms de ces médicaments? (**Acceptez les noms génériques ou commerciaux**).

|     |
|-----|
| [ ] |
| [ ] |
| [ ] |
| [ ] |
| [ ] |

99 = Ne sait pas

A14. L'examen sanguin de laboratoire pour le diagnostic du paludisme est-il disponible au niveau de ce point de distribution?

|         |                         |
|---------|-------------------------|
| 1 = Oui | Allez à la question 14a |
| 0 = Non | Allez à la question 15  |

A14a. Combien coûte l'examen sanguin de laboratoire (goutte épaisse, frottis sanguin...) pour le diagnostic du paludisme? **Ecrivez le prix en monnaie locale:** .....[ ][ ][ ][ ][ ] FC

00000 = Si gratuit  
99999 = Ne sait pas

A15. Les tests de diagnostic rapide (TDR) de paludisme sont disponibles ici? (Si Oui, il doit te montrer le kit.)

|         |                         |
|---------|-------------------------|
| 1 = Oui | Allez à la question 16a |
| 0 = Non | Allez à la question P1  |

A16a. Combien coûte un test de diagnostic rapide (TDR) de paludisme? **Ecrivez le prix en monnaie locale**  
.....[ ][ ][ ][ ][ ] FC

00000 = Si gratuit  
99999 = Ne sait pas

**IV. Questionnaire au Fournisseur**P1. Quelle est votre profession? (*Spontané. Possibilité de réponses multiples*)

- 1 = Pharmacien
- 2 = Médecin
- 3 = Sage-femme/accoucheuse
- 4 = Infirmier(ère)
- 5 = Technicien de laboratoire
- 6 = Propriétaire
- 7 = Vendeur
- 8 = Membre de famille
- 9 = Autre (*Précisez*) [\_\_\_\_\_]

P2. Depuis combien de temps travaillez dans ce point de distribution? .....[ ][ ] ans

P3. Avez-vous en stock en ce moment l'antipaludique que vous avez **le plus vendu**/dispensé au cours du **mois passé** ?

- 1 = Oui en stock      Demandez à voir physiquement le médicament et utilisez l'emballage pour remplir les questions P3a-e
- 0 = Pas en stock      Demandez au fournisseur de se rappeler le plus possible des informations pour les questions P3a-e

*Les enquêteurs doivent remplir le tableau avec les informations provenant de l'emballage du médicament ou des réponses du fournisseur.*

| P3a. Nom générique du médicament le plus vendu au cours du <u>mois passé</u> | P3b. Dosage<br>(Ecrivez le dosage et les unités correctes NB: Pas de ml pour les comprimés, Suppositoires, Poudres and Granules)<br>99 = Ne sait pas | P3c. Présentation                                                                                                                                                           | P3d. Non commercial<br>99 = Ne sait pas | P3e. Fabricant<br>99 = Ne sait pas |
|------------------------------------------------------------------------------|------------------------------------------------------------------------------------------------------------------------------------------------------|-----------------------------------------------------------------------------------------------------------------------------------------------------------------------------|-----------------------------------------|------------------------------------|
| 99 = Ne sait pas                                                             |                                                                                                                                                      |                                                                                                                                                                             |                                         |                                    |
|                                                                              | [ ][ ][ ] mg/<br>[ ][ ][ ] mL                                                                                                                        | 1 = Comprimé<br>2 = Suppositoire<br>3 = Sirop<br>4 = Suspension<br>5 = Liquide injectable<br>6 = Poudre injectable<br>7 = Granule<br>8 = Autre ( <i>précisez</i> )<br>_____ |                                         |                                    |
|                                                                              | [ ][ ][ ] mg/<br>[ ][ ][ ] mL                                                                                                                        |                                                                                                                                                                             |                                         |                                    |
|                                                                              | [ ][ ][ ] mg/<br>[ ][ ][ ] mL                                                                                                                        | 99 = Ne sait pas                                                                                                                                                            |                                         |                                    |

P4. Selon vous, quel est l'antipaludéen le plus **efficace**? (*Considérez soit le Nom générique soit le Nom commercial. Demandez au fournisseur de vous montrer le médicament s'il se trouve en stock*)

Ecrivez la réponse..... [\_\_\_\_\_]

99 = Ne sait pas

P4a. Le médicament est-il en stock?

- 1 = Oui
- 0 = Non

Interviewer Code – District – Sub-District – Outlet ID: [ ][ ][ ]-[ ][ ][ ]-[ ][ ][ ]-[ ][ ][ ]

P5. Quel antipaludique recommandez-vous souvent à vos clients? (**Considérez soit le Nom générique, soit le Nom commercial. Demandez au fournisseur de vous montrer le médicament s'il se trouve en stock.**)

Ecrivez la réponse ..... [\_\_\_\_\_]

P5a. Cet antipaludique est-il en stock?

1 = Oui

0 = Non

P6. Comment déterminez-vous habituellement quels antipaludiques à acheter et avoir en stock ? (**Spontané. Possibilité de réponses multiples.**)

1 = Plus rentable/profitable

2 = Recommandé par le gouvernement

3 = Prix les plus bas

4 = Influence des firmes pharmaceutiques/délégues commerciaux

5 = Demande de la clientèle

6 = Réputation de la marque

7 = Présentation (Comprimés, injection)

8 = Facile à avoir

99 = Ne sait pas

P7. Vos clients demandent-ils /désignent-ils habituellement les antipaludiques qu'ils achètent par leurs noms respectifs? (**Spontané. Une seule réponse possible.**)

0 = Non, ils demandent que vous leur recommandiez un médicament

1 = Oui, ils demandent/désignent par leurs noms respectifs

2 = Non, ils ont une prescription/ordonnance

99 = Ne sait pas

P8. Décidez-vous souvent quel antipaludique vos clients doivent-ils prendre ? (**Spontané. Une seule réponse possible.**)

0 = Non

1 = Oui

2 = Non, sur prescription/ordonnance

99 = Ne sait pas

P9. Environ combien de personnes ont-elles acheté ou ont reçu un antipaludique ici au cours de la semaine passée?

..... [ ][ ][ ]

P10. Au cours des 3 mois passés, les clients ont-ils acheté des antipaludiques à crédit? (**Demandez seulement aux fournisseurs du secteur privé. Si le point de distribution est une formation sanitaire publique, allez à la question P11.**)

1 = Oui Allez à la question P10a

0 = Non Allez à la question P11

99 = Ne sait pas Allez à la question P11

P10a. Au cours de la semaine passée, combien de clients ont-ils acheté des antipaludiques à crédit?

[ ][ ][ ]

999 = Ne sait pas



Interviewer Code – District – Sub-District – Outlet ID: [ ][ ][ ]-[ ][ ][ ]-[ ][ ][ ]-[ ][ ][ ]

P10b. Quelles catégories de clients achètent-ils les antipaludiques à crédit? **(Ne pas lire. Possibilité de réponses multiples)**

- 1 = Clients réguliers
- 2 = Personnel du Point de Vente
- 3 = Les personnes qui ne peuvent pas payer par manque de moyen
- 4 = Les clients ayant des enfants malades
- 5 = Les clients bien connus par le fournisseur
- 6 = Autre **(précisez)** [\_\_\_\_\_]
- 99 = Ne sait pas

P11. Au cours des **3 mois** passés, avez coupé les blisters ou vendu des traitements partiels (incomplets) d'antipaludiques aux clients qui n'avaient pas assez d'argent pour acheter la cure complète?

- 1 = Oui
- 0 = Non
- 99 = Ne sait pas

P12. S'il vous plaît, pouvez-vous citer le nom du médicament recommandé par le gouvernement pour le traitement du paludisme simple?

**(Ecrivez la réponse)** [\_\_\_\_\_]

- 0 = Mauvaise réponse **(précisez)** [\_\_\_\_\_]
- 1 = Bonne réponse **(précisez)** [\_\_\_\_\_]
- 99 = Ne sait pas

Allez à question P13  
Allez à question P12a  
Allez à question P13

P12a. S'il vous plaît, pouvez-vous expliquer le régime de traitement recommandé pour ce médicament pour un **adulte** ? **(Vous pouvez aider en posant la question "Combien de comprimés de combien de mg chacun/ou combien de mg/kg par jour pour combien de jours?" C'est une bonne réponse s'il donne la réponse en lisant sur l'emballage, mais n'incitez pas le fournisseur à le faire).**

- 0 = Réponse correcte **(précisez)** [\_\_\_\_\_]
- 1 = Bonne réponse **(précisez)** [\_\_\_\_\_]
- 99 = Ne sait pas

P12b. S'il vous plaît, pouvez-vous expliquer le régime de traitement recommandé pour ce médicament pour un **enfant de 2 ans** ? **(Vous pouvez aider en posant la question "Combien de comprimés de combien de mg chacun/ou combien de mg/kg par jour pour combien de jours?" C'est une bonne réponse s'il donne la réponse en lisant sur l'emballage, mais n'incitez pas le fournisseur à le faire).**

- 0 = Réponse correcte **(précisez)** [\_\_\_\_\_]
- 1 = Bonne réponse **(précisez)** [\_\_\_\_\_]
- 99 = Ne sait pas

P13. Quels sont les signes de danger de paludisme sévère chez un enfant de moins de 5 ans ? **(Possibilité de réponses multiples. Ne pas lire ni suggérer.)**

- 1 = Extrême fatigue
- 2 = Difficulté de parler, s'asseoir, se tenir debout, ou de marcher
- 3 = Incapacité de boire ou de téter
- 4 = Vomissements à répétition
- 5 = Convulsions
- 6 = Troubles de conscience/coma
- 7 = Ictère/jaunisse
- 8 = Pâleur
- 9 = Extrémités froides
- 10 = Saignements anormaux: gencives, nez, peau
- 11 = Elimination d'urines en petites quantités, de couleur foncée ou noire
- 12 = Respiration anormale
- 13 = Autre (**Précisez**): [\_\_\_\_\_]
- 99 = Ne sait pas

P14. Quels sont les signes de danger de paludisme sévère chez un enfant de moins de 5 ans qui vous inciteraient à le référer vers une structure de référence ? **(Demandez seulement aux fournisseurs dans les structures privées. Si dans une structure publique, allez à la question P15. Possibilité de réponses multiples. Ne pas lire ni suggérer.)**

- 1 = Extrême fatigue
- 2 = Difficulté de parler, s'asseoir, se tenir debout, ou de marcher
- 3 = Incapacité de boire ou de téter
- 4 = Vomissements à répétition
- 5 = Convulsions
- 6 = Troubles de conscience/coma
- 7 = Ictère/jaunisse
- 8 = Pâleur
- 9 = Extrémités froides
- 10 = Saignements anormaux: gencives, nez, peau
- 11 = Elimination d'urines en petites quantités, de couleur foncée ou noire
- 12 = Respiration anormale
- 13 = Autre (**Précisez**): [\_\_\_\_\_]
- 99 = Ne sait pas

P15. Parmi le personnel qui travaille ici, en existe t-il qui ait participé à une formation dans le domaine de la santé organisée par une ONG ou par le gouvernement au cours des 2 dernières années?

- 1 = Oui
- 0 = Non
- 99 = Ne sait pas

P16. Y compris le propriétaire, combien de personnes travaillent-elles ici ? ..... [ ][ ]

P17. De toutes les personnes qui travaillent ici, combien de prescrivent ou dispensent les médicaments? [ ][ ]

P18. Toutes les personnes qui travaillent ici ont-elles terminé l'école primaire? **(Encerclez une réponse)**

- 1 = Oui                      Allez à la question P19
- 0 = Non                     Allez à la question P20
- 99 = Ne sait pas        Allez à la question P20

Interviewer Code – District – Sub-District – Outlet ID: [ ][ ][ ]-[ ][ ][ ]-[ ][ ][ ]-[ ][ ][ ]

P19. Toutes les personnes qui travaillent ici ont-elles terminé l'école secondaire? **(Encerlez une réponse)**

1 = Oui

0 = Non

99 = Ne sait pas

P20. Des personnes qui travaillent ici, en existe-t-il qui possède une qualification dans le domaine de la santé? **(Encerlez une réponse)**

1 = Oui

Allez à question P20a

0 = Non

Allez à question P21

99 = Ne sait pas

Allez à question P21

P20a. Quels types de qualification? **(Suggérez. Possibilité de réponses multiples)**

1 = Pharmacien

2 = Médecin

3 = Sage-femme

4 = Infirmier(ère)

5 = Technicien de laboratoire

6 = Autre **(Précisez):** [ ]

## **SOURCE D'APPROVISIONNEMENT EN ANTIPALUDIQUES**

P21. Au cours des 3 derniers mois, quel fournisseur vous approvisionne/vend t-il les médicaments antipaludiques et les tests de diagnostic rapides de paludisme? **(S'il vous plaît, citez deux (2) places où le point de distribution achète souvent les antipaludéens)**

**Premier fournisseur:**

P21a. Type de fournisseur **(Suggérez. Une seule réponse possible):**

1 = Grossiste Général

2 = Grossiste pharmaceutique

3 = Pharmacie formelle/ enregistré

4 = "Pharmacie"

5 = Distributeur pharmaceutique

6 = Firme pharmaceutique/fabricant

7 = Autre **(précisez):** ..... [ ]

88 = Refuse

99 = Ne sait pas

P21b. Nom de l'établissement fournisseur : [ ]

88 = Refuse

99 = Ne sait pas

P21c. Ville: [ ]

88 = Refuse

99 = Ne sait pas

P21d. Adresse physique ou indicateurs de localisation:

[ ]

88 = Refuse

99 = Ne sait pas

P21e. Numéro de Téléphone : ..... [ ]

88 = Refuse

99 = Ne sait pas

Interviewer Code – District – Sub-District – Outlet ID: [ ][ ][ ]-[ ][ ][ ]-[ ][ ][ ]-[ ][ ][ ]

P21f. Comment recevez-vous vos antipaludiques provenant de ce fournisseur? (**Suggérez, une seule réponse possible**)

- 1 = Le fournisseur vous les livre?
- 2 = Vous allez chercher auprès du fournisseur
- 3 = Les deux
- 88 = Refuse
- 99 = Ne sait pas

P21g. Est-ce que ce fournisseur vend t-il aussi les tests de diagnostic rapide de paludisme? (**Ne demandez pas si le fournisseur avait répondu "Non" à la question A15 de la Section III. Select « 82 = Non applicable.»**)

- 1 = Oui
- 0 = Non
- 82 = Non applicable
- 99 = Ne sait pas

**Deuxième fournisseur:**

P21h. Type de fournisseur (**Suggérez. Une seule réponse possible**):

- 1 = Grossiste Général
- 2 = Grossiste pharmaceutique
- 3 = Pharmacie formelle/enregistrée
- 4 = « Pharmacie »
- 5 = Distributeur pharmaceutique
- 6 = Firme pharmaceutique/fabricant
- 7 = Autre (**précisez**): ..... [\_\_\_\_\_]
- 88 = Refuse
- 99 = Ne sait pas

P21b. Nom de l'établissement fournisseur : [\_\_\_\_\_]

- 88 = Refuse
- 99 = Ne sait pas

P21c. Ville: [\_\_\_\_\_]

- 88 = Refuse
- 99 = Ne sait pas

P21d. Adresse physique ou indicateurs de localisation:

[\_\_\_\_\_]

[\_\_\_\_\_]

- 88 = Refuse
- 99 = Ne sait pas

P21e. Numéro de Téléphone : ..... [\_\_\_\_\_]

- 88 = Refuse
- 99 = Ne sait pas

P21f. Comment recevez-vous vos antipaludiques provenant de ce fournisseur? (**Suggérez, une seule réponse possible**)

- 1 = Le fournisseur vous les livre?
- 2 = Vous allez chercher auprès du fournisseur
- 3 = Les deux
- 88 = Refuse
- 99 = Ne sait pas

P21g. Est-ce que ce fournisseur vend t-il aussi les tests de diagnostic rapide de paludisme? (**Ne demandez pas si le fournisseur avait répondu "Non" à la question A15 de la Section III. Select « 82 = Non applicable.»**)

- 1 = Oui
- 0 = Non
- 82 = Non applicable
- 99 = Ne sait pas

## **STATUT LEGAL DU POINT DE DISTRIBUTION**

P22. Avez une autorisation/licence pharmaceutique, médicale/Clinique, d'ONG ou de missionnaire ? *(Si dans une formation sanitaire publique, sélectionnez "Non applicable")*

1 = Oui

0 = Non

82 = Non applicable

P23. Avez une autre autorisation/licence registration?

1 = Oui                    Allez à la question P23a

0 = Non                    Allez à la question P24

P23a. Quel (le) type (catégorie) d'autorisation/licence? (Encerclez tout ce qui est valable)

1 = Etablissement

2 = Laboratoire

3 = Autre (*précisez*): [\_\_\_\_\_]

## **DONNEES DE L'OBSERVATION**

P24. Avez-vous vu/observé le document d'autorisation/licence? *(Si dans une formation sanitaire publique, sélectionnez "Non applicable")*

1 = Oui

0 = Non

82= Non applicable

P25. Les médicaments sont-ils entreposés dans un endroit sec?

1 = Oui, ils sont entreposés dans un endroit sec

0 = Non, ils ne sont pas entreposés dans un endroit sec

P26. Les médicaments sont-ils protégés des rayons solaires directs?

1 = Oui, ils sont protégés des rayons solaires directs

0 = Non, ils ne sont pas protégés contre les rayons solaires directs

P27. Les médicaments sont-ils entreposés à même le sol ?

1 = Oui, ils sont entreposés à même le sol

0 = Non, ils ne sont pas entreposés à même le sol

**X2. Commentaires finaux (si nécessaire)**

**FIN DE L'ENQUETE.** Remerciez les fournisseurs pour leur participation à l'enquête. Retournez à la question C12 pour enregistrer le statut final de l'enquête et le temps de la fin.
